# Supplementary material for: Synthesis and photophysical properties of blue emission maleimide molecules with dual-state emission (DSE) effects
Source: Royal Society of Chemistry journal article supplement (doi:10.1039/d3nj01253k), 2023-01-01
Supplement: d3nj01253k1.pdf [file d3nj01253k1.pdf]

*New Journal of Chemistry*

**Supporting information**

**Synthesis and photophysical properties of blue emission maleimide  
molecules with Dual-State Emission (DSE) effects**

Xiaodong Yang, Kazuhiro Yamabuki and Kenjiro Onimura<sup>†</sup>

Department of Applied Chemistry, Graduate School of Sciences and Technology for Innovation,  
Yamaguchi University  
2-16-1 Tokiwadai, Ube, Yamaguchi 755-8611, Japan

<sup>†</sup>To whom correspondence should be addressed (TEL: +81-836-85-9283, FAX: +81-836-85-9201, E-mail: [onimura@yamaguchi-u.ac.jp](mailto:onimura@yamaguchi-u.ac.jp))

1.  $^1\text{H}$  and  $^{13}\text{C}$  NMR spectra of compound 1.

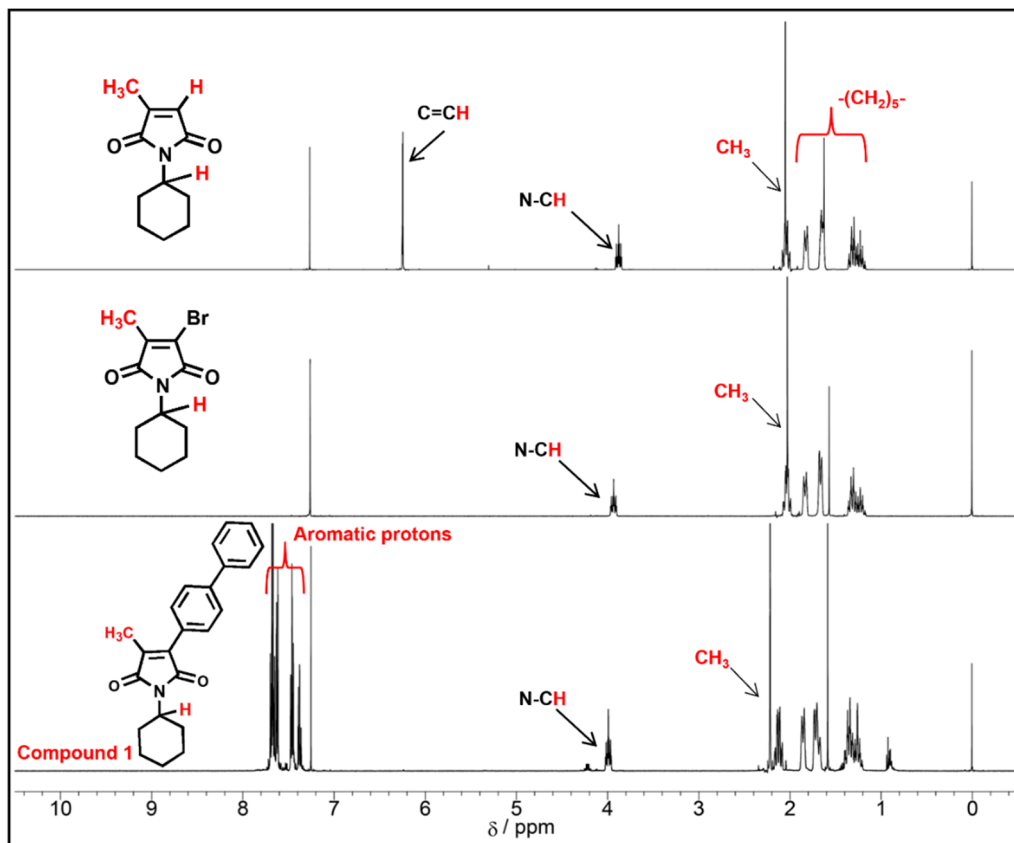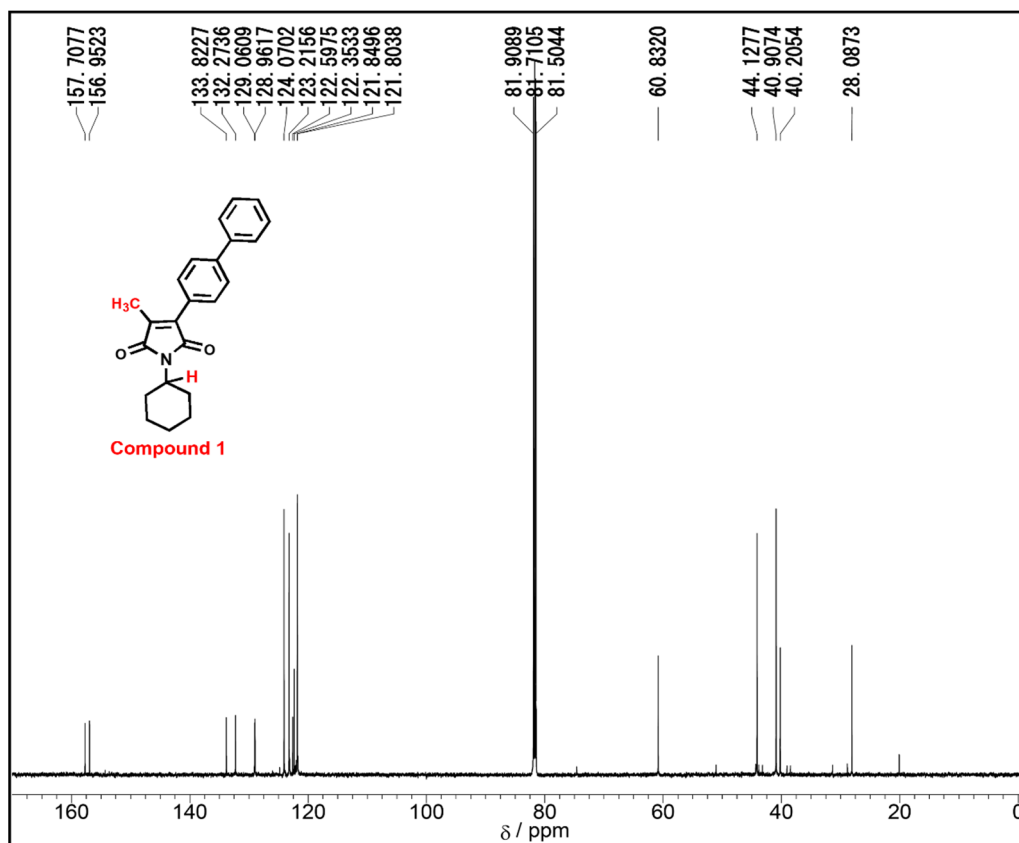

2.  $^1\text{H}$  and  $^{13}\text{C}$  NMR spectra of compound 2.

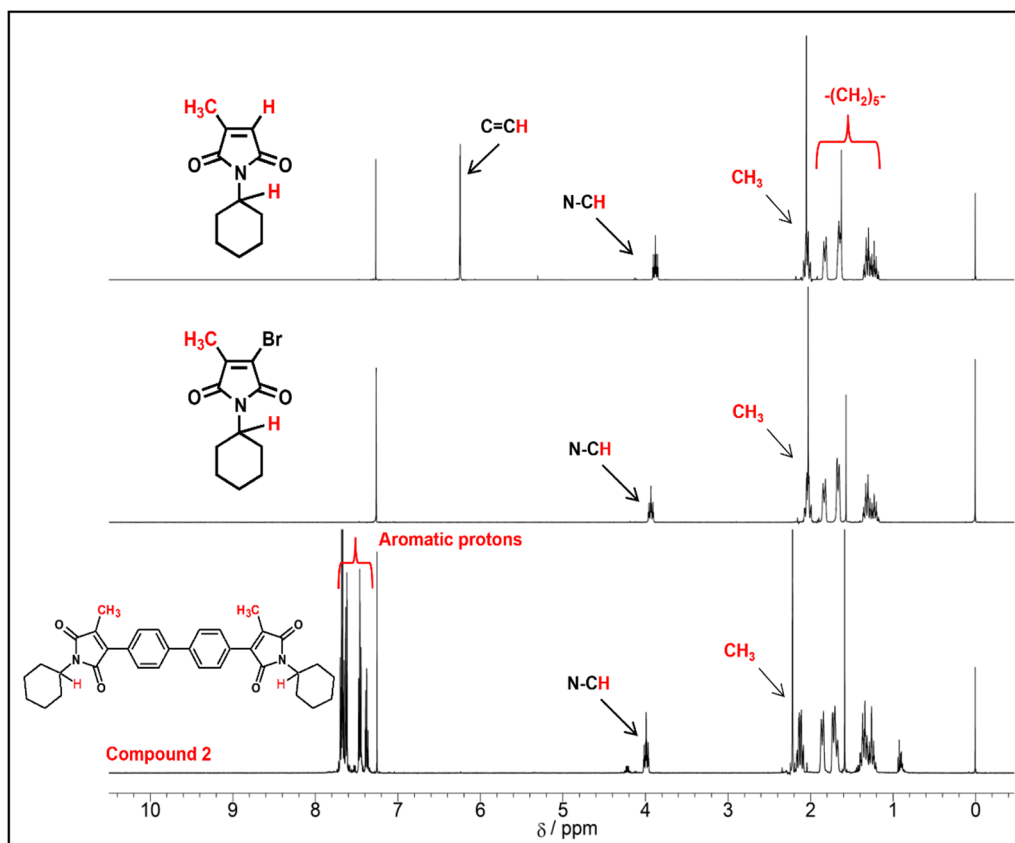

Figure S3.  $^1\text{H}$  NMR Spectrum of compound 2 in  $\text{CDCl}_3$ .

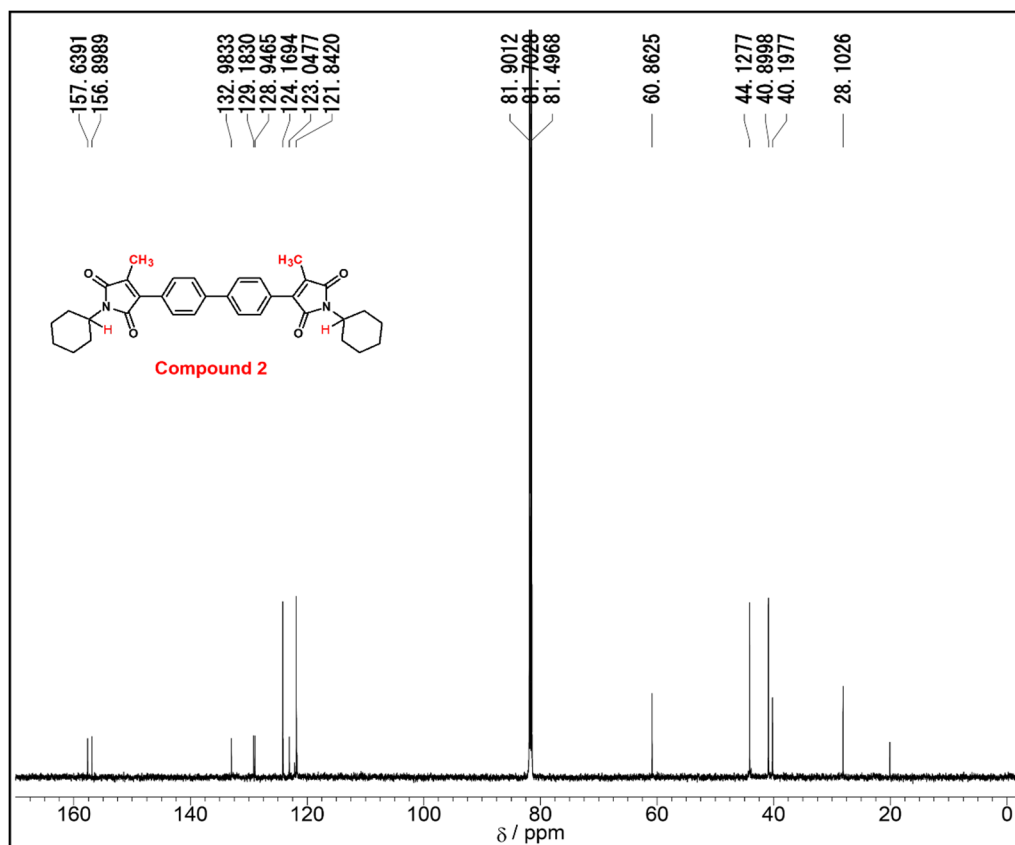

Figure S4.  $^{13}\text{C}$  NMR Spectrum of compound 2 in  $\text{CDCl}_3$ .

### 3. Optical properties of fluorophores in water-THF mixtures.

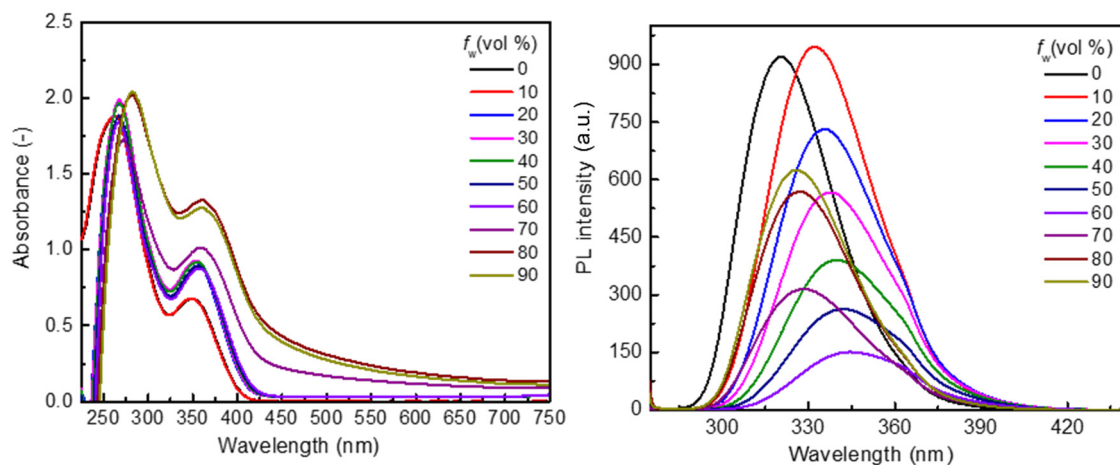

**Figure S5.** Absorption spectrum and emission spectrum of compound **1** in a mixture of water-THF.

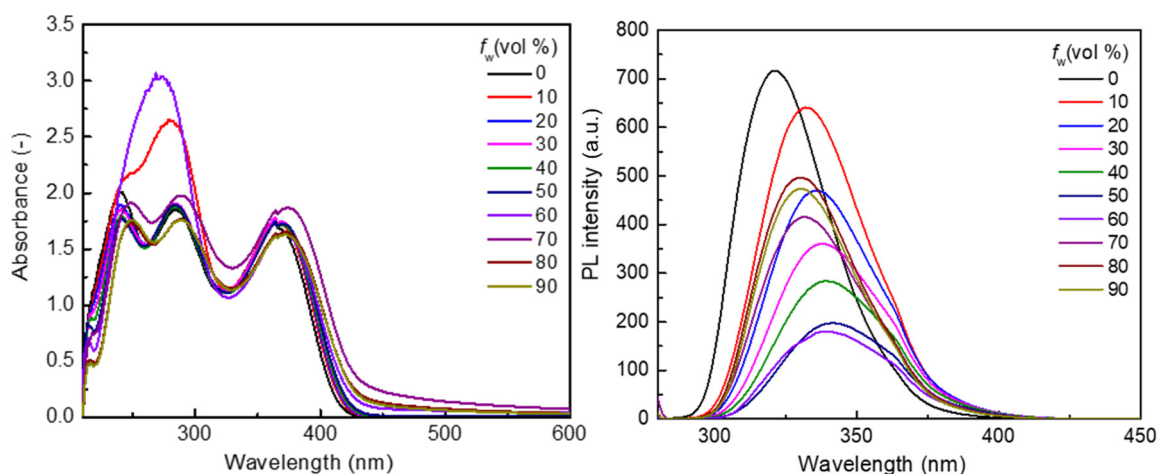

**Figure S6.** Absorption spectrum and emission spectrum of compound **2** in a mixture of water-THF.

### 4. Optical properties of fluorophores in different solvent.

**Table S1**

| Solvent      | <b>1</b>                                  |                                          |                                    |            |                            | <b>2</b>                                  |                                          |                                    |            |                            |
|--------------|-------------------------------------------|------------------------------------------|------------------------------------|------------|----------------------------|-------------------------------------------|------------------------------------------|------------------------------------|------------|----------------------------|
|              | $\lambda_{\text{abs}}^{\text{a}}$<br>(nm) | $\lambda_{\text{em}}^{\text{a}}$<br>(nm) | $\Delta s$<br>( $\text{cm}^{-1}$ ) | CIE (x,y)  | $\mu_e - \mu_g^{\text{b}}$ | $\lambda_{\text{abs}}^{\text{a}}$<br>(nm) | $\lambda_{\text{em}}^{\text{a}}$<br>(nm) | $\Delta s$<br>( $\text{cm}^{-1}$ ) | CIE (x,y)  | $\mu_e - \mu_g^{\text{b}}$ |
| Toluene      | 353                                       | 460                                      | 6590                               | 0.14, 0.14 | 1.23 D                     | 368                                       | 458                                      | 5340                               | 0.14, 0.13 | 2.09 D                     |
| THF          | 349                                       | 461                                      | 6961                               | 0.14, 0.15 | 5.03 D                     | 365                                       | 461                                      | 5705                               | 0.15, 0.16 | 8.62 D                     |
| Acetone      | 348                                       | 469                                      | 7414                               | 0.14, 0.19 | 6.09 D                     | 360.5                                     | 474                                      | 6642                               | 0.15, 0.23 | 10.9 D                     |
| Acetonitrile | 349                                       | 472                                      | 7467                               | 0.15, 0.24 | 6.36 D                     | 359.5                                     | 480                                      | 6983                               | 0.15, 0.28 | 11.5 D                     |
| DMF          | 351                                       | 478                                      | 7569                               | 0.15, 0.25 | 6.13 D                     | 364.5                                     | 484                                      | 6774                               | 0.16, 0.30 | 11.1 D                     |

a)  $1.0 \times 10^{-5}$  mol/L

b)  $\mu_e$  and  $\mu_g$  represents the Dipolar moments in the excited (e) and ground (g) states, respectively.

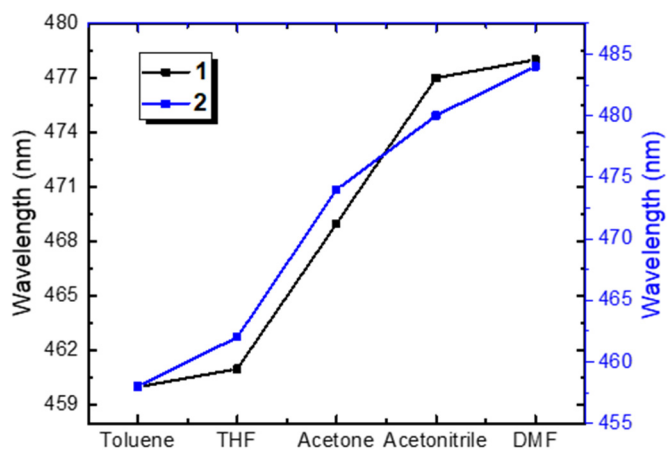

**Figure S7.** The change of the emission maximum wavelength of fluorophore **1** and **2** in solvent of different polarity (*conc.*:  $1.0 \times 10^{-5}$  mol/L).

5.  $^1\text{H}$  NMR Spectra of fluorophores on addition of TFA in  $\text{CDCl}_3$ .

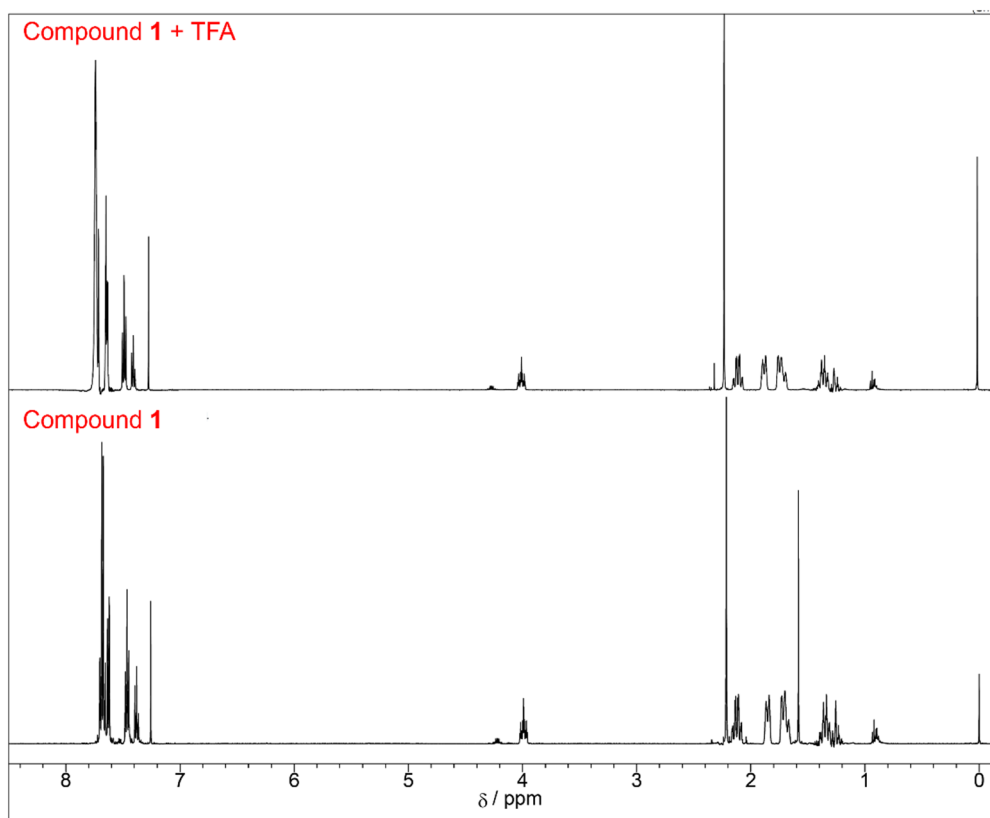

**Figure S8.**  $^1\text{H}$  NMR Spectrum of compound **1** on addition of TFA in  $\text{CDCl}_3$ .

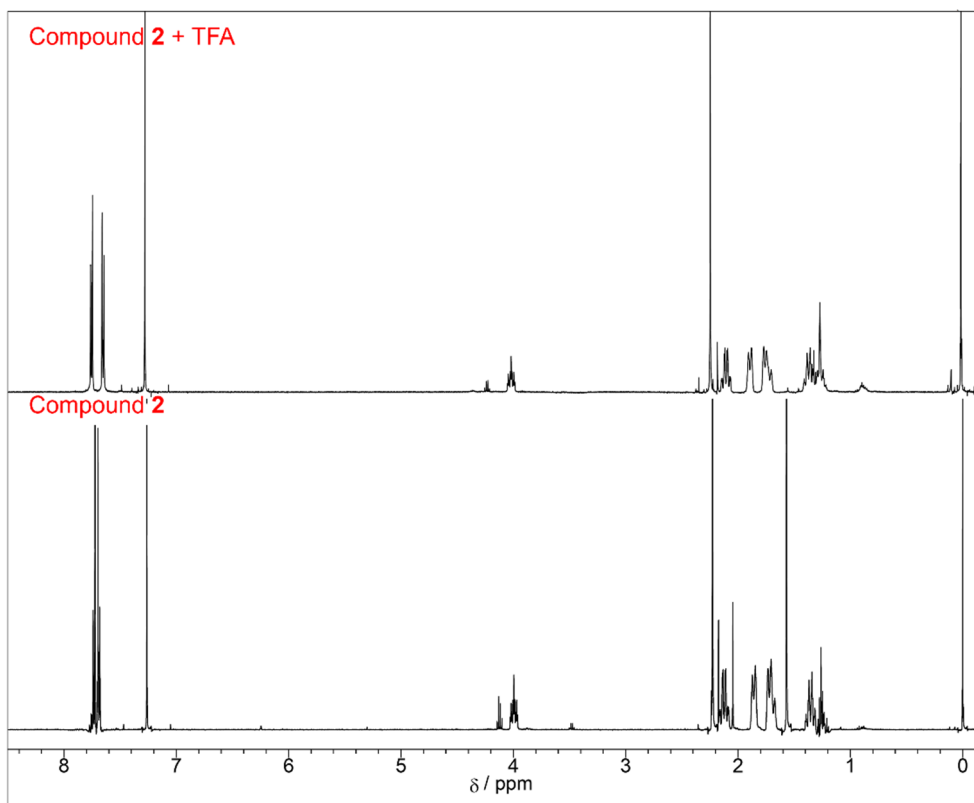

**Figure S9.** <sup>1</sup>H NMR Spectrum of compound **2** on addition of TFA in CDCl<sub>3</sub>.
